# Supplementary material for: Rapid defense responses in maize leaves induced by Spodoptera exigua caterpillar feeding
Source: PubMed Central journal article supplement (PMC5853842; doi:10.1093/jxb/erx274), 2017-08-22
Supplement: erx274_suppl_supplementary_tables_s1-s13.pdf [file erx274_suppl_supplementary_tables_s1-s13.pdf]

**Figure S1.**

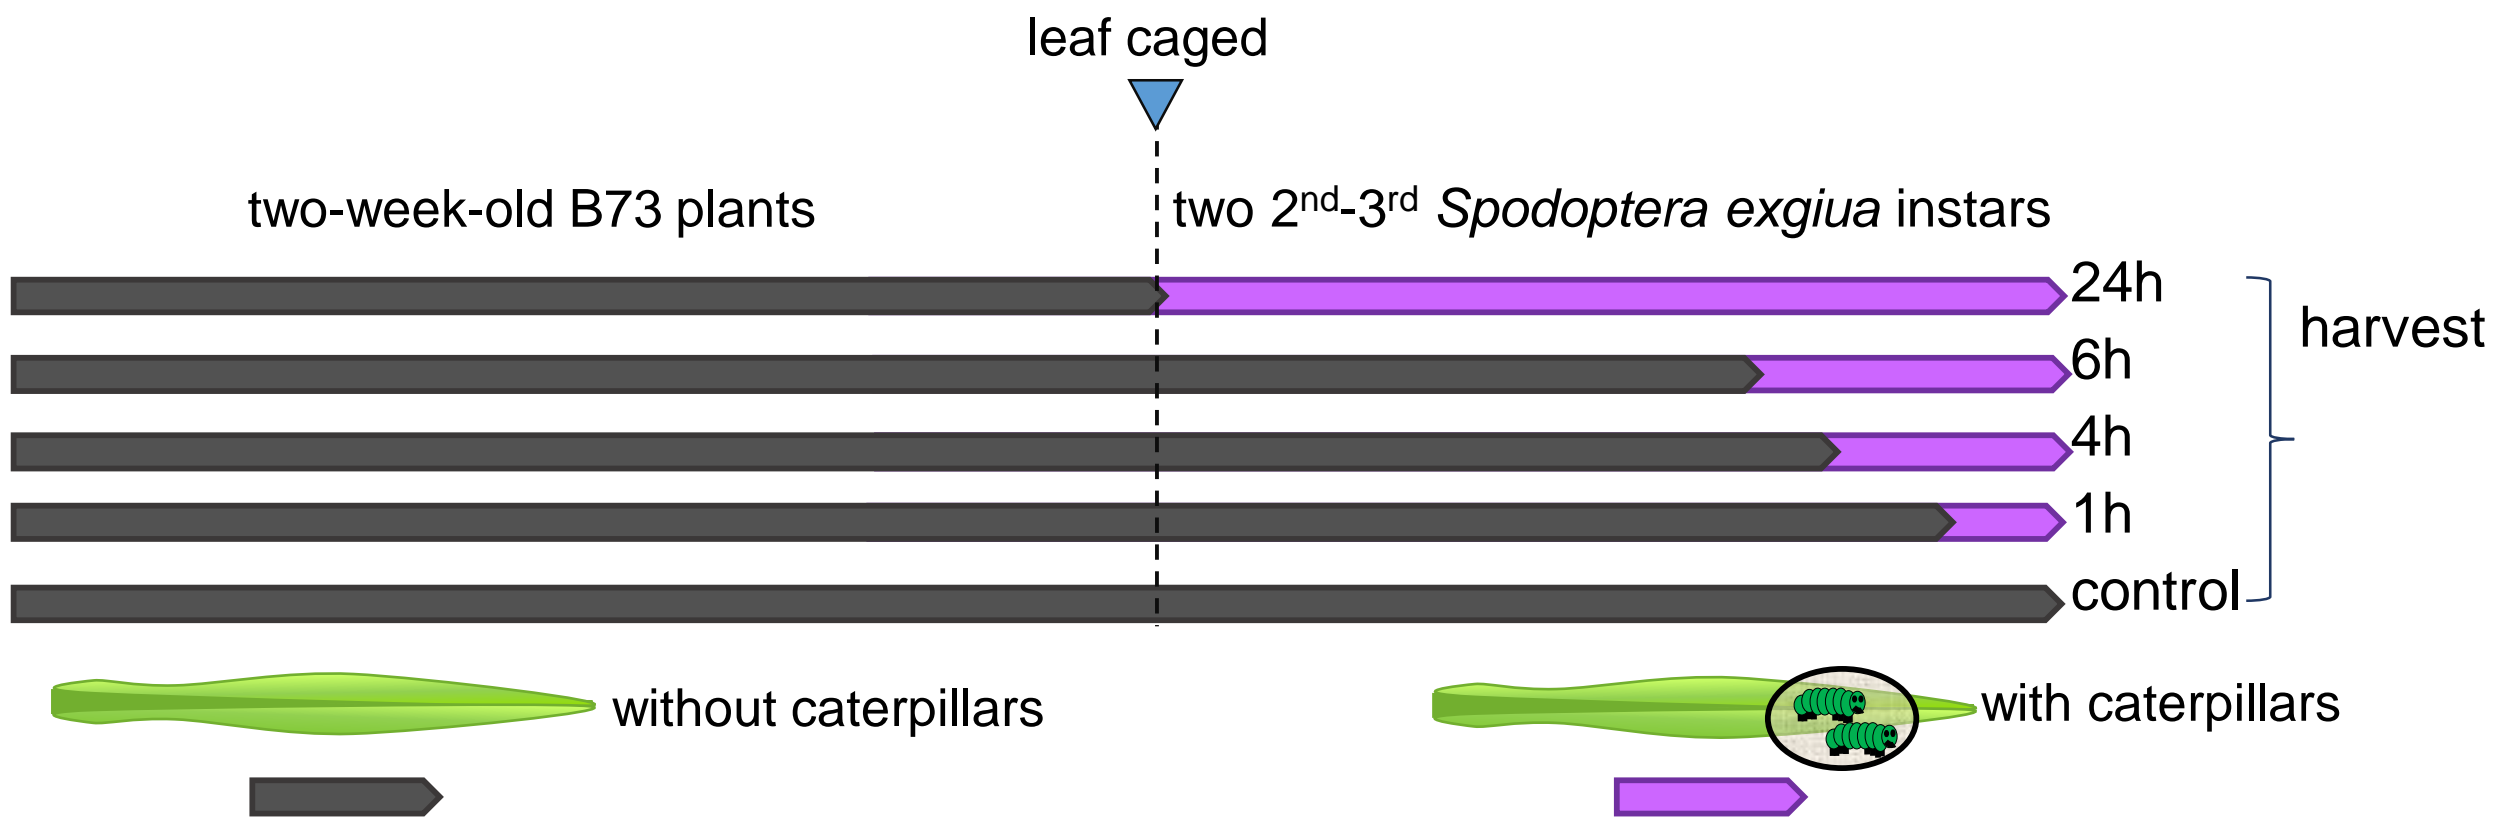

**Supplementary Figure S1.** Design of the caterpillar feeding experiments. The third leaf of two-week-old B73 maize plants was enclosed in a clip cage. At staggered intervals, two second to third instar *S. exigua* caterpillars were added to each cage. Leaf tissue was harvested after 1 hr to 24 hr of caterpillar feeding. All samples, including controls (untreated), were harvested within a 45-min time period. Harvested tissue was used for assays of gene expression by Illumina sequencing, as well as for metabolite profiling.

**Figure S2.**

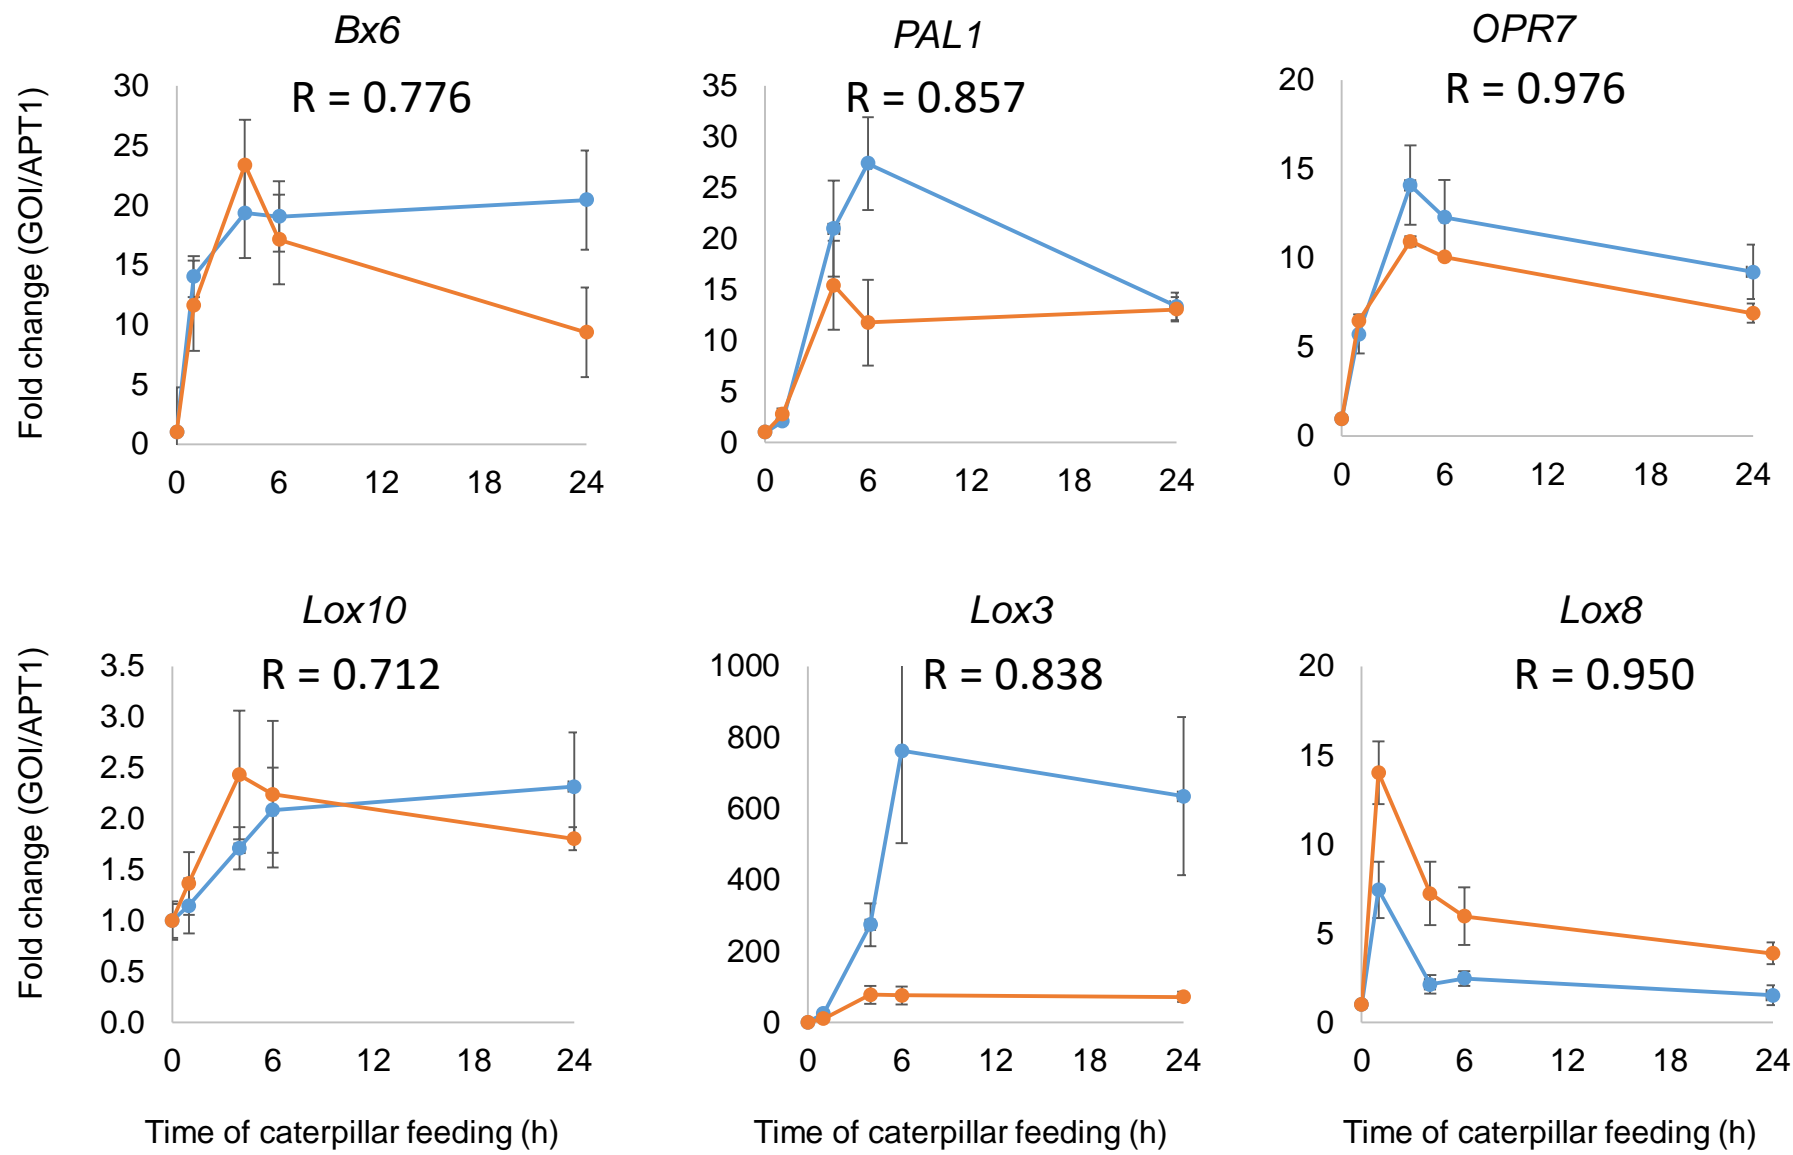

**Supplementary Figure S2.** Comparison of RNAseq and qRT-PCR gene expression data from two independent sets of experimental samples. The following genes were measured by qRT-PCR and RNAseq and normalized to Adenine Phosphate Transferase 1 (*APT1*): GRMZM2G131907 - its expression level did not change across the caterpillar infestation period, *Bx6* - GRMZM6G617209, Phe Ammonia-lyase (*PAL*) - GRMZM2G063917, 12-oxo-phytodienoic acid reductase 7 (*OPR7*) - GRMZM2G148281, Lipoxxygenase 10 (*LOX10*) - GRMZM2G015419, Lipoxxygenase 3 (*LOX3*) - GRMZM2G109130, and Lipoxxygenase 8 (*LOX8*) - GRMZM2G104843. Mean +/- SE of n = 4, for RNAseq (orange) and n = 5 for qRT-PCR (blue). R value = correlation coefficient.

**Figure S3.**

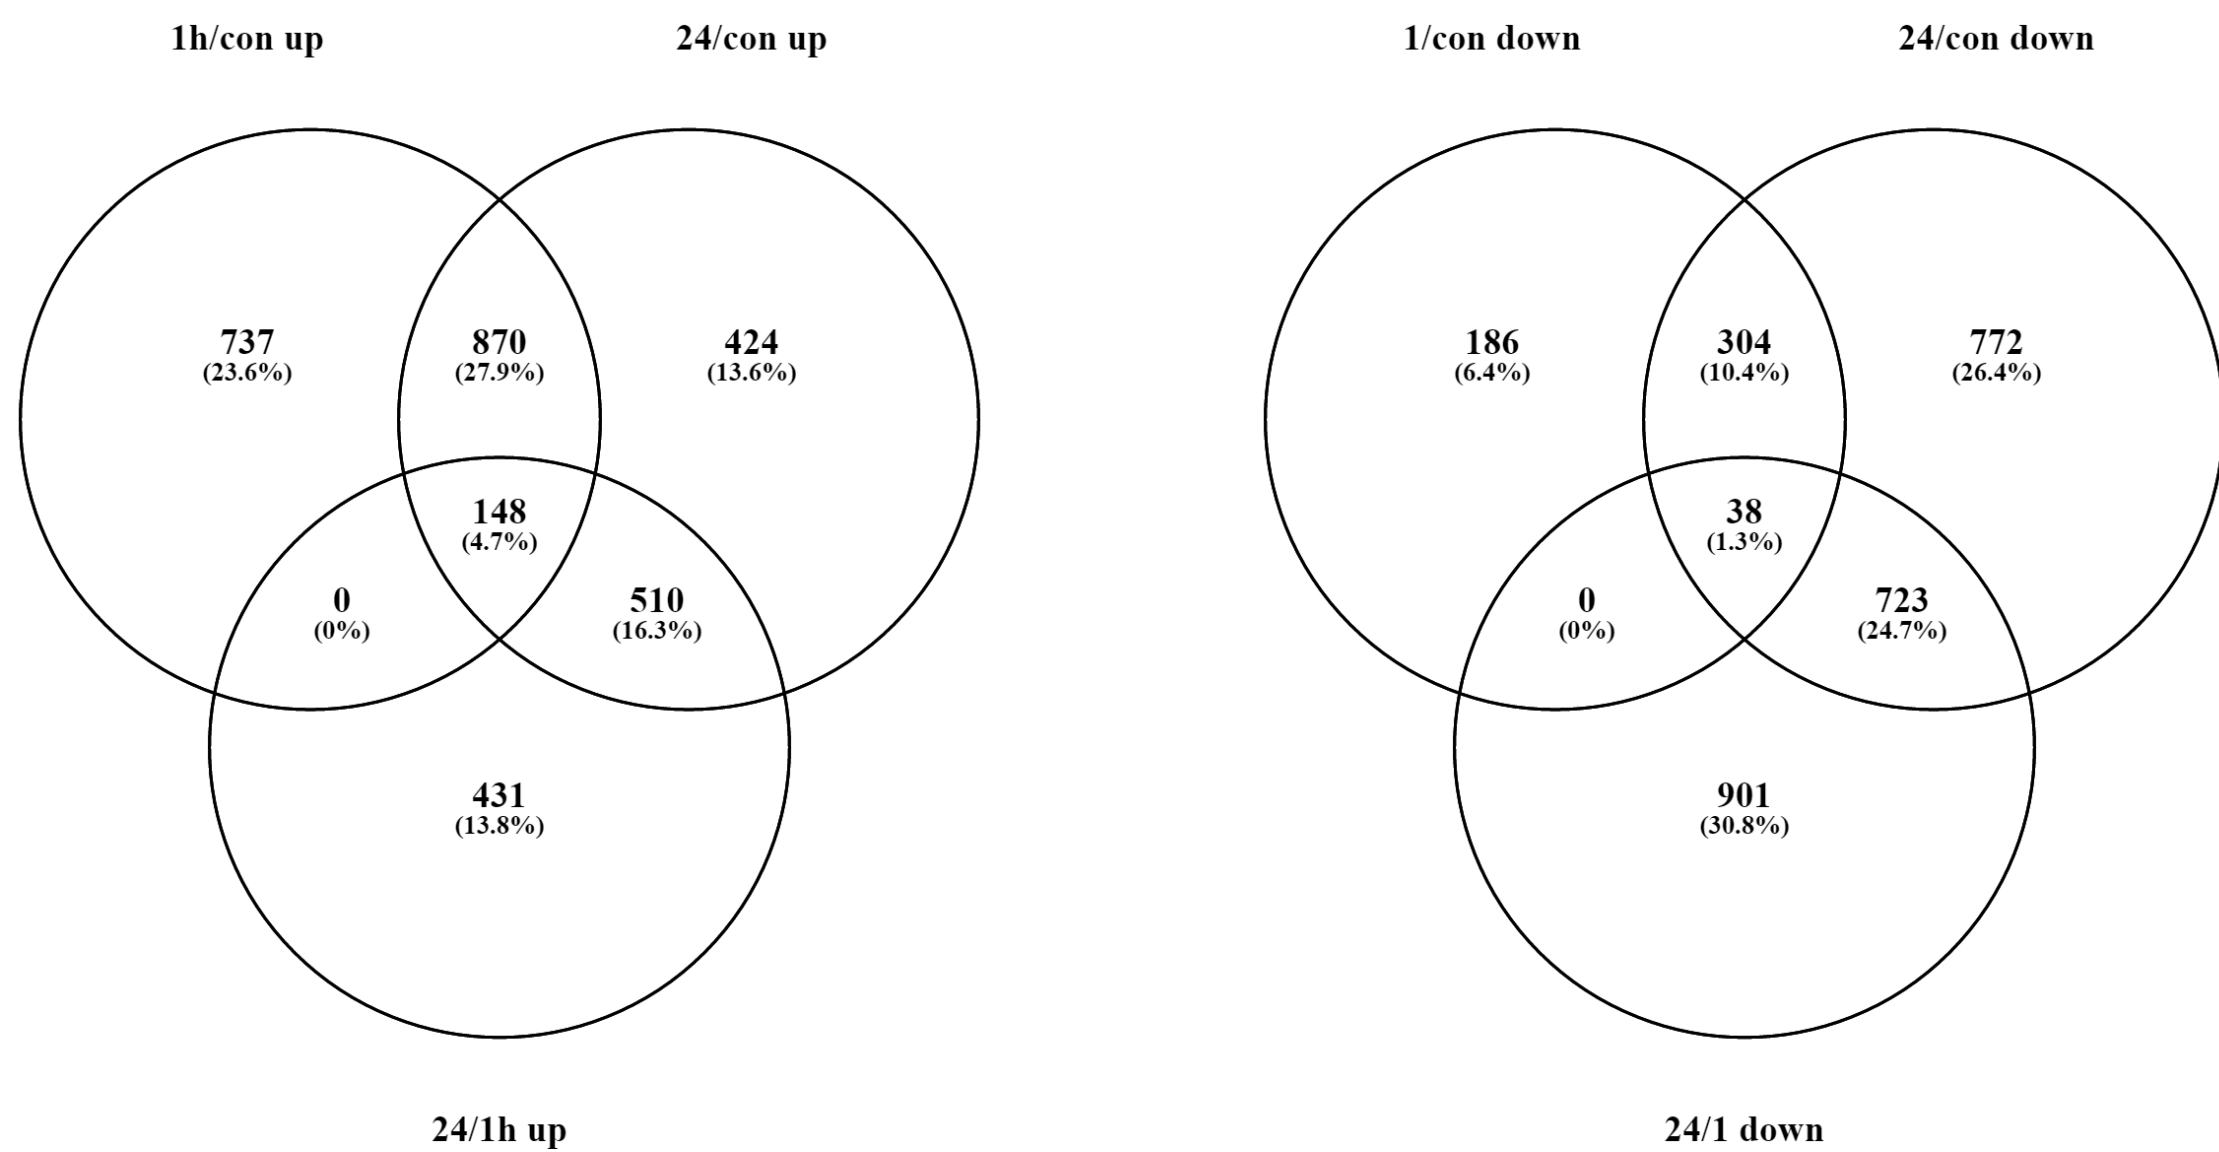

**Supplementary Figure S3.** Venn diagram describing the number of genes up- or down-regulated by caterpillar infestation after 1 hr and 24 hr relative to the control and 1 hr relative to 24 hr.  $P$  value  $< 0.05$  FDR and fold change  $> 2$  or  $< 0.5$ .

**Figure S4.**

Group 1 -  
strong increasing average  
(two standard deviations)

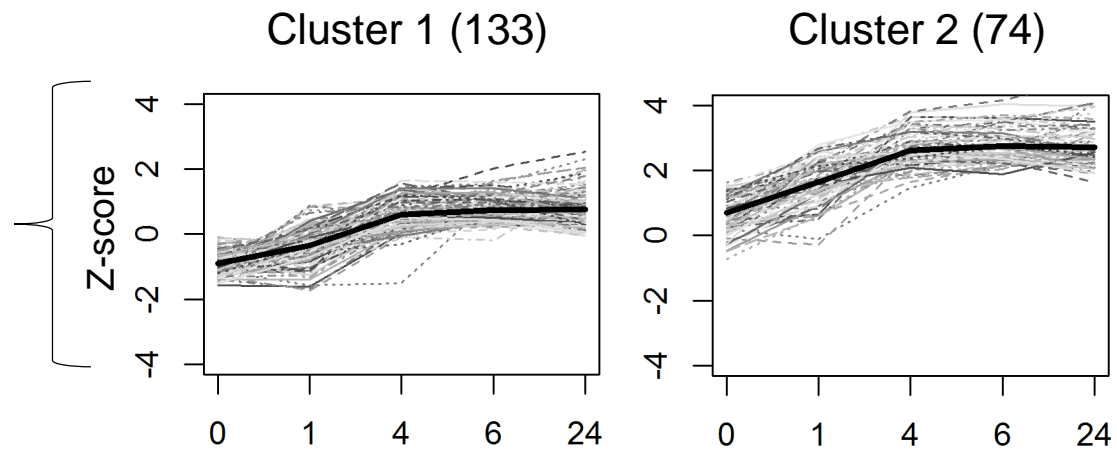

Group 2 -  
moderately increasing  
average (approximately  
one standard deviation)

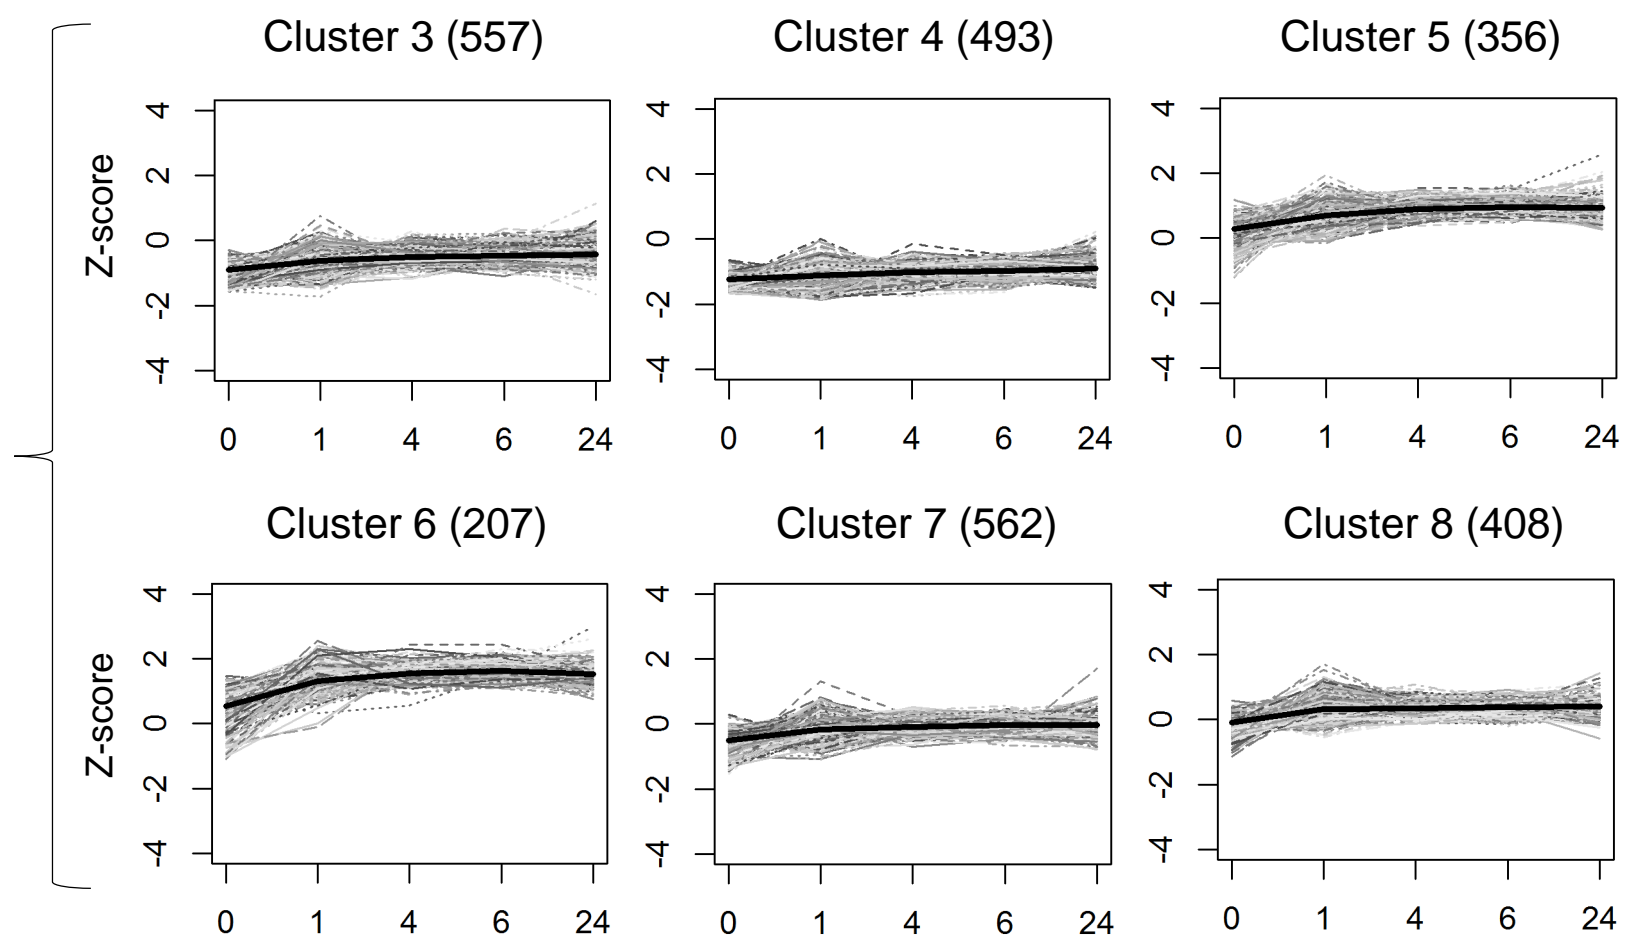

Group 3 -  
moderately decreasing  
average (approximately  
one standard deviation)

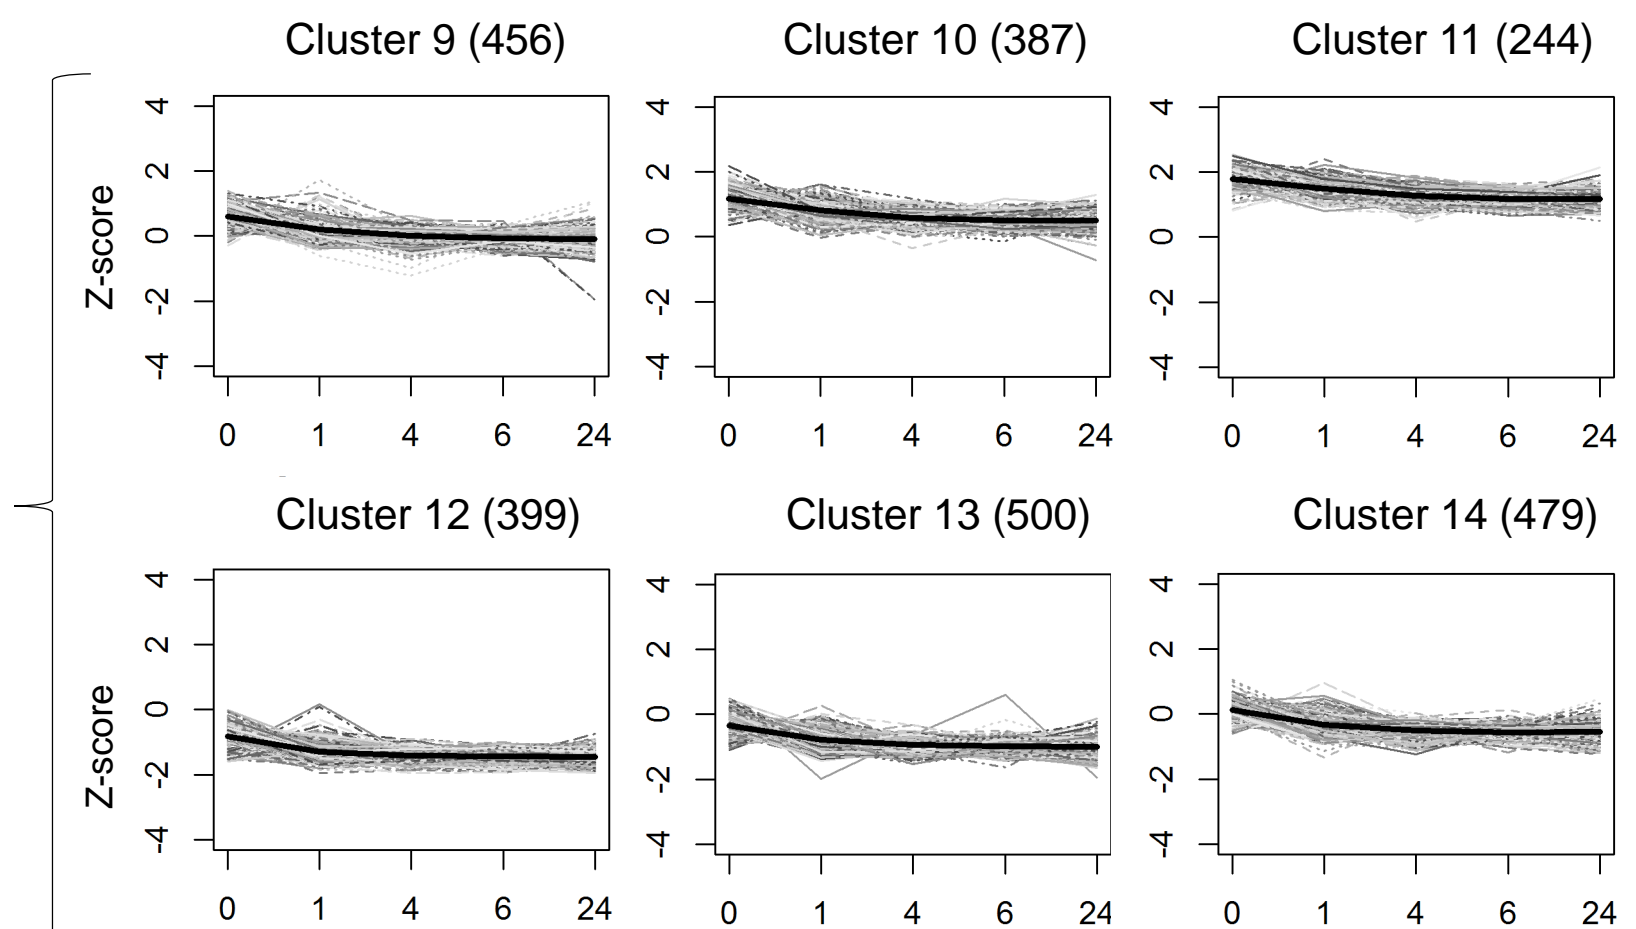

Group 4 -  
moderately decreasing  
averages that significantly  
deviate from the population  
average (high FPKM)

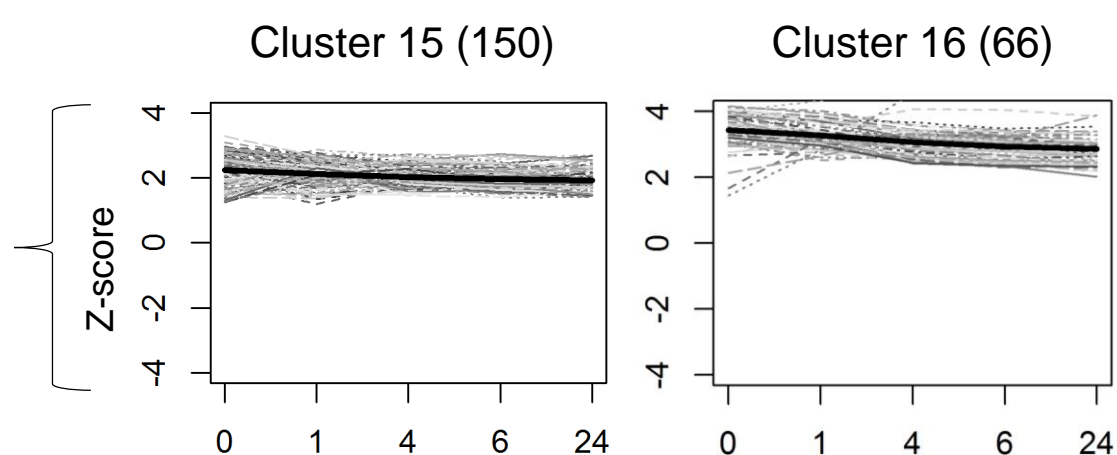

**Supplementary Figure S4.** K-means clustering of genes expressed during caterpillar infestation. Gene expression in FPKM log2 values after *S. exigua* feeding over a 0–24 hr time course. Genes were selected based on the following parameters:  $P$  value < 0.05 FDR and fold change >  $\pm 2$  (5,470 genes). In bold: Z-score represents the number of standard deviations between the genes represented in the cluster and the mean of the population distribution. In brackets: the number of genes in each cluster.

**Figure S5**

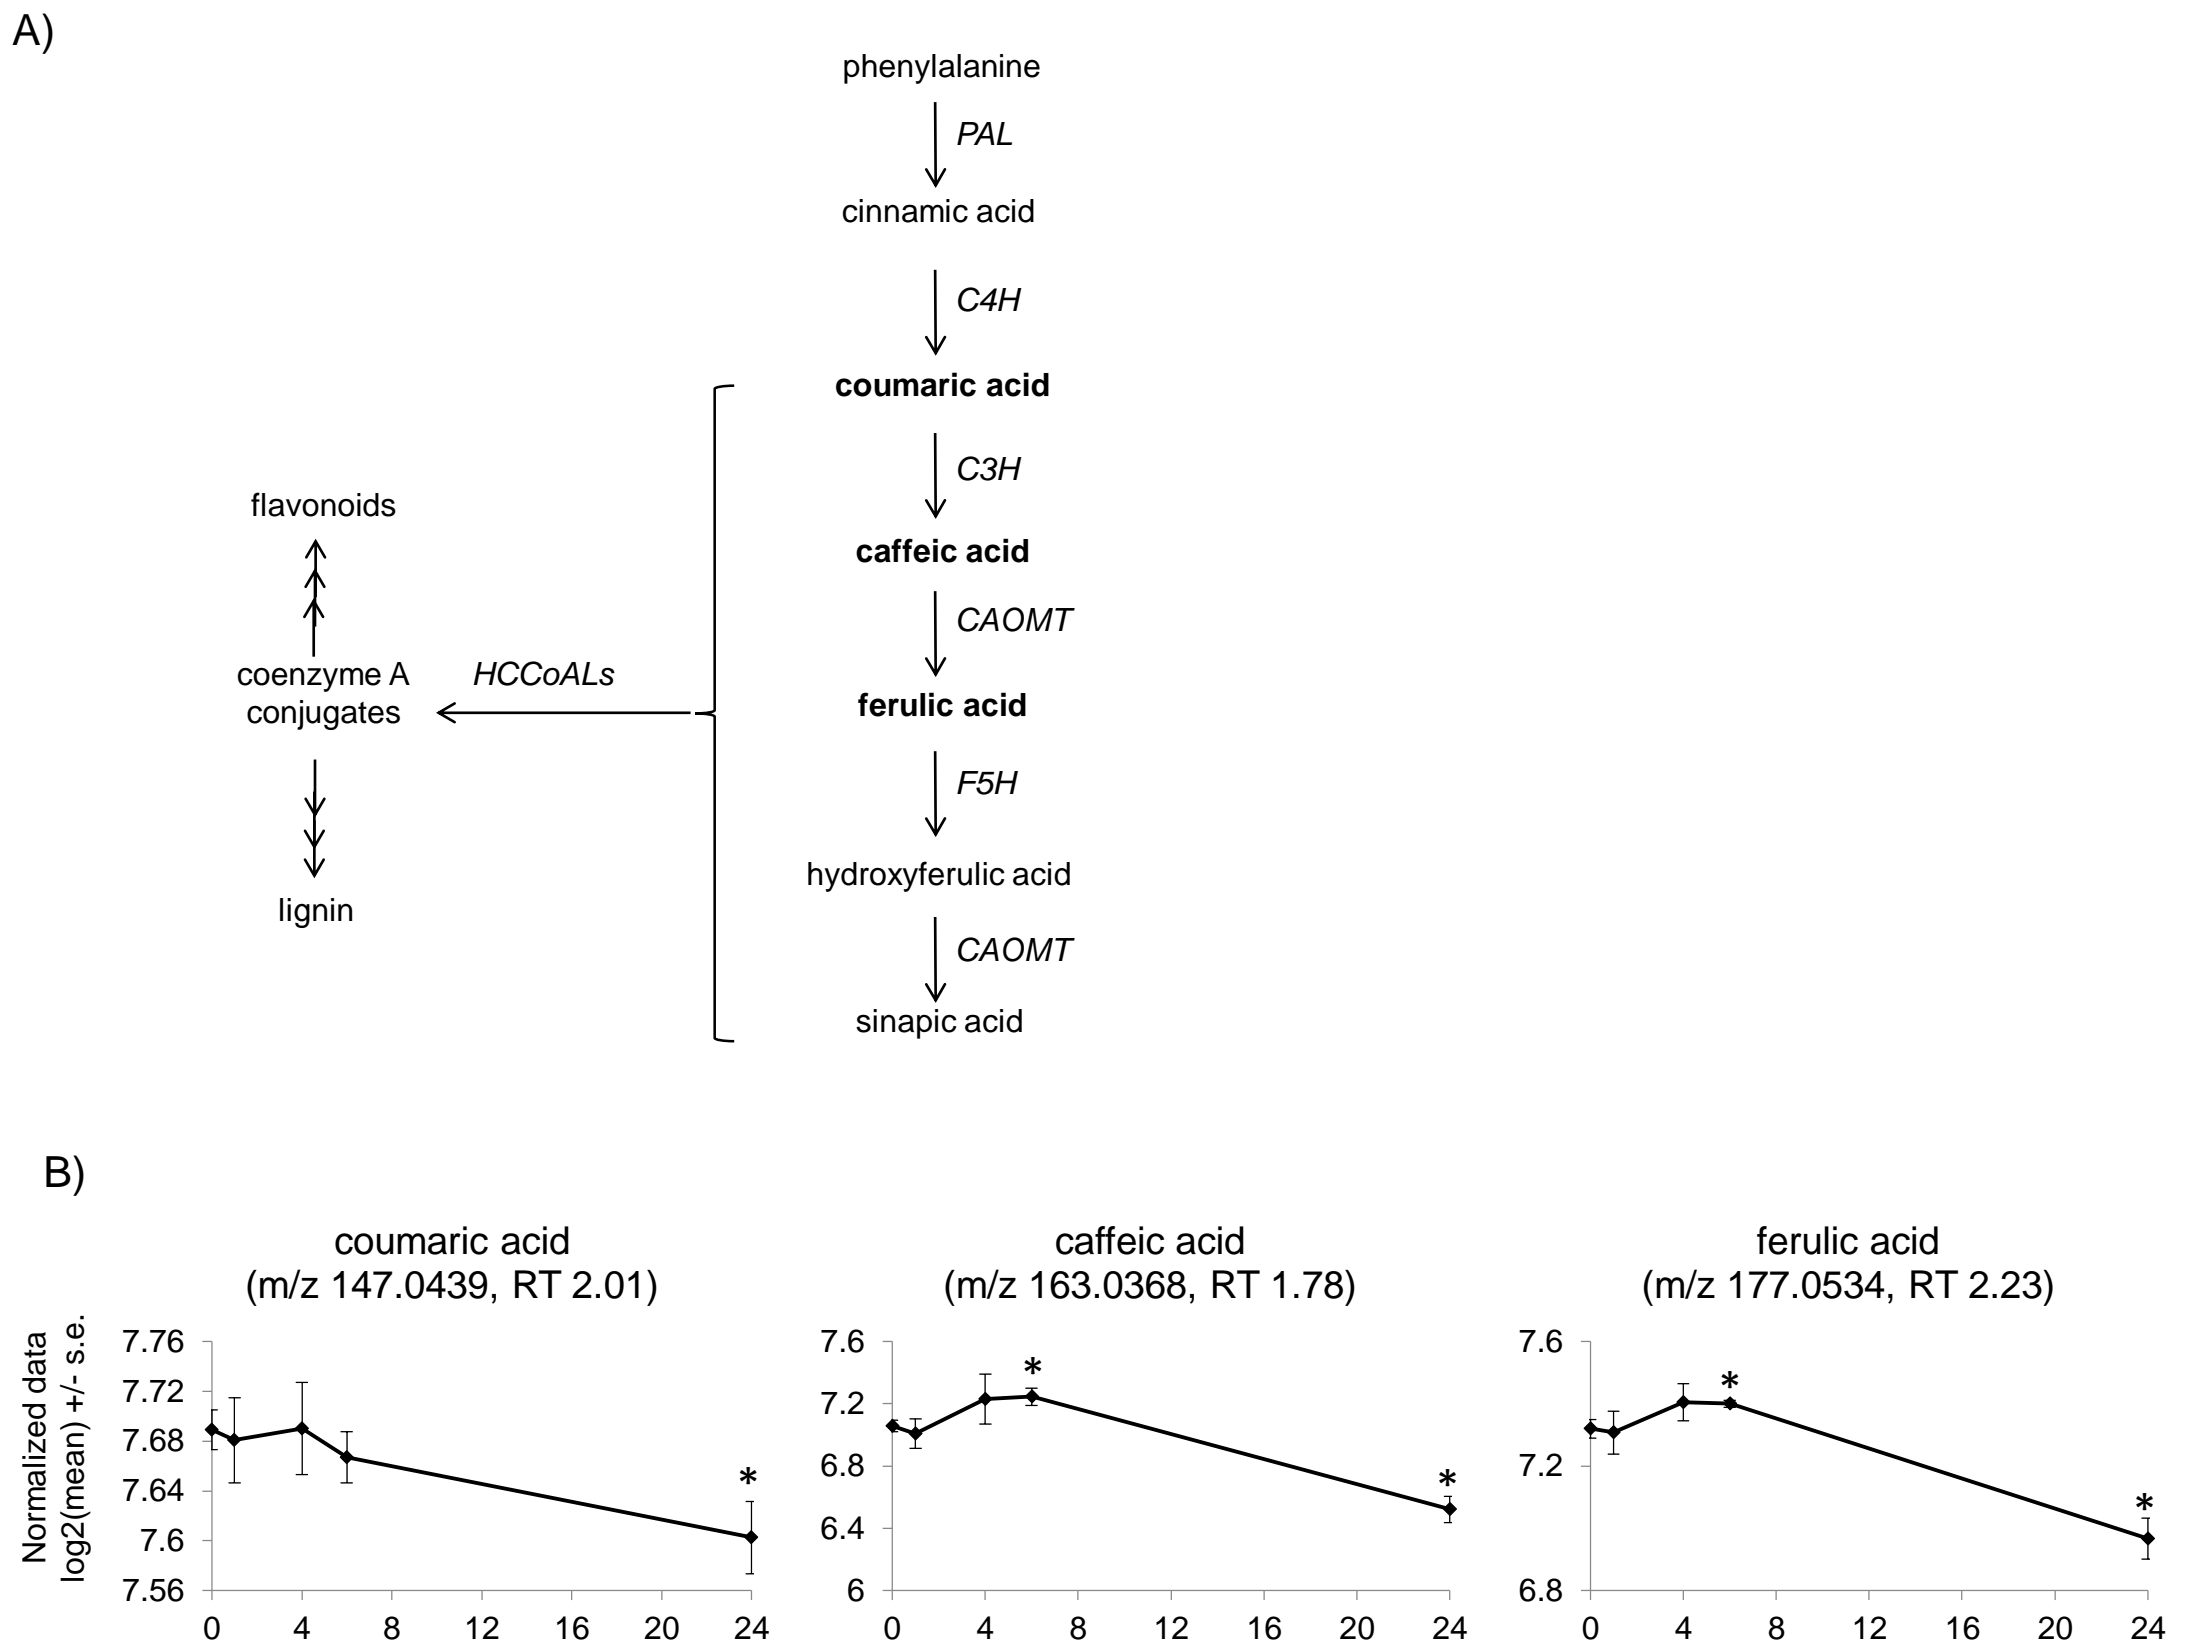

**Supplementary Figure S5.** Effects of caterpillar feeding on phenylpropanoid biosynthesis. A) A schema of the initial pathway of phenylpropanoid biosynthesis. In bold, metabolites that were identified in the LC-MS dataset. B) The normalized levels of three phenylpropanoid metabolites. The MS/MS spectrum was compared to the RIKEN MSn Spectrum Database for Phytochemicals (ReSpect; <http://spectra.psc.riken.jp/>). \* $P < 0.05$ , Student's  $t$ -test. Mean  $\pm$  SE of  $n = 5$ .

**Figure S6**

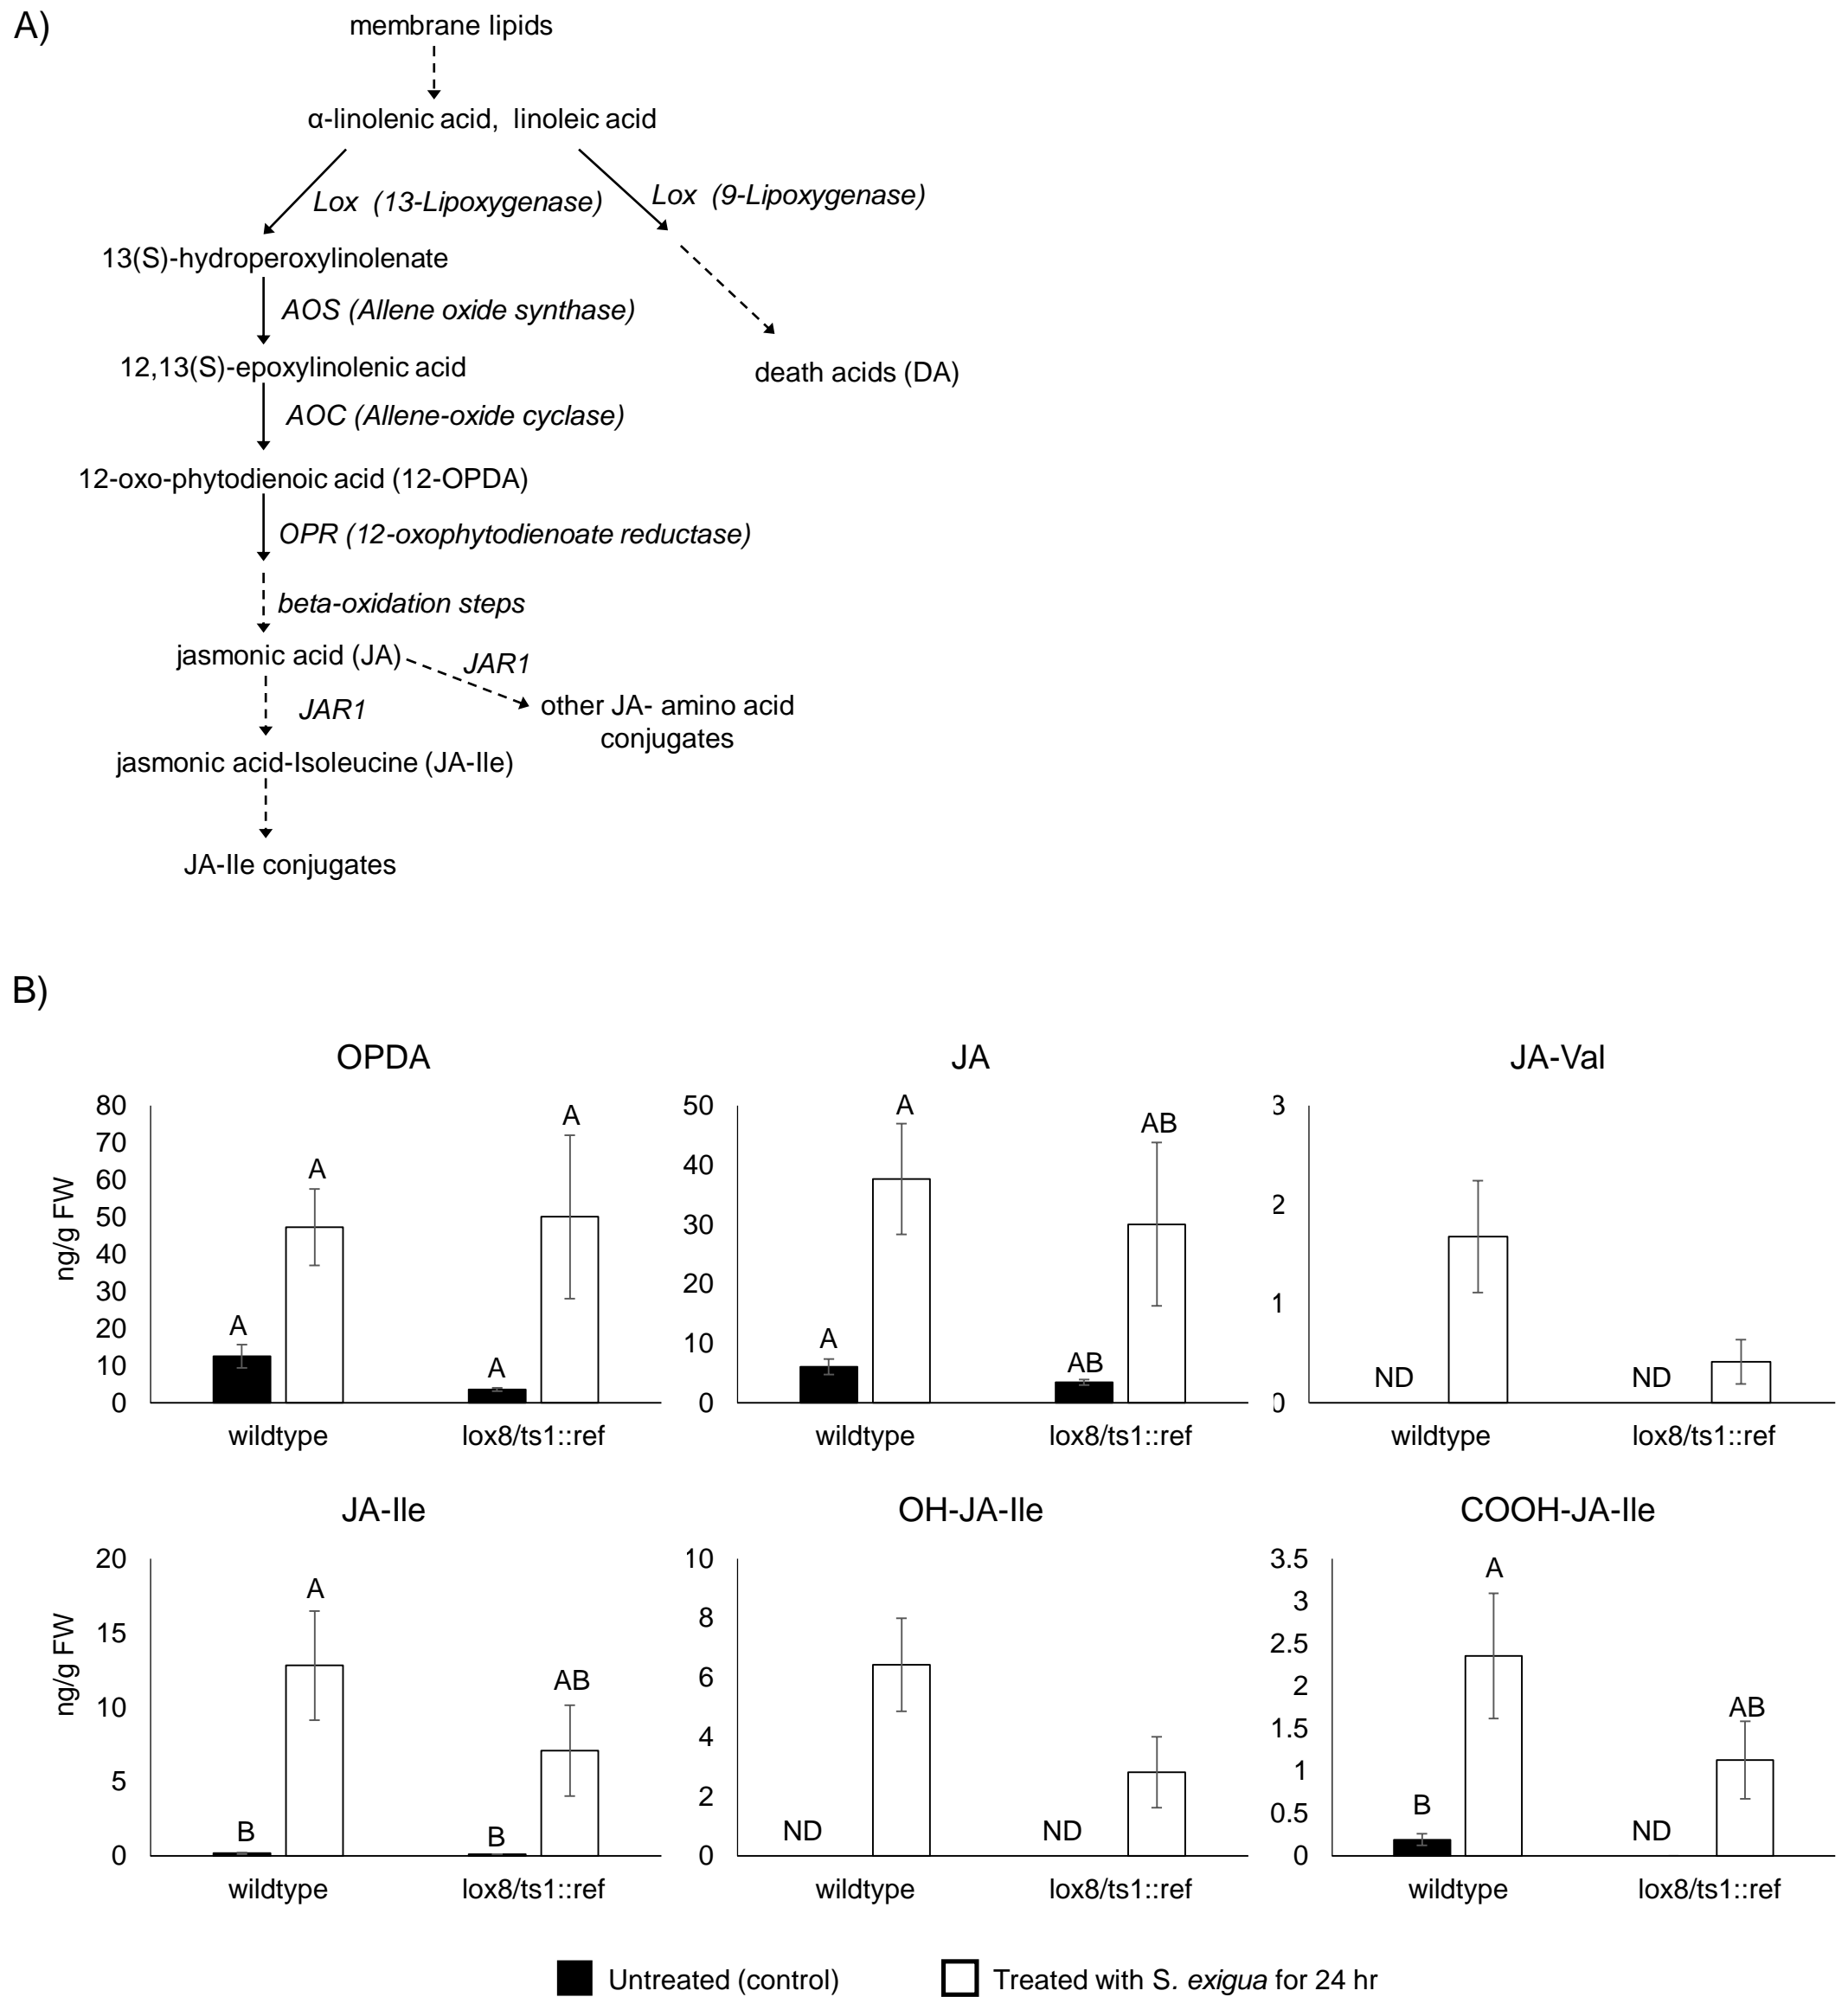

**Supplementary Figure S6.** Effects of caterpillar feeding on jasmonic acid pathway. A) The jasmonic acid biosynthesis and catabolic pathway in maize. B) JA and JA conjugate levels of *lox8/ts1-ref* (*LOX8*; GRMZM2G104843) gene knockout in response to caterpillar attack. Black bars: untreated, white bars: caterpillar infestation for 24 hr. Different letters above the bars indicate significant differences,  $P < 0.05$ , ANOVA followed by Tukey's HSD test. ND = not detected.

**Figure S7**

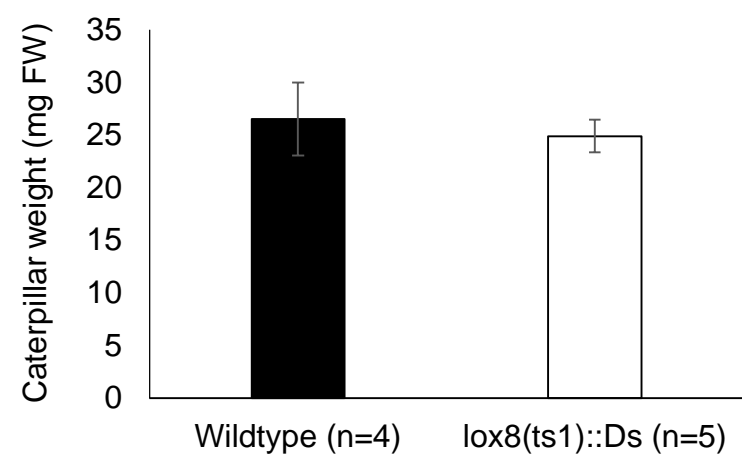

**Supplementary Figure S7.** *S. exigua* caterpillar body weight after four days on wildtype (*Lox8/ts1*), and homozygote mutant (*lox8/ts1::Ds*) plants. Mean  $\pm$  SE of  $n = 4-5$ .  $*P < 0.05$  Student's *t*-test relative to uninfested control showed no significant differences between the plants.
